# Supplementary material for: Targeting CEBPA to restore cellular identity and tissue homeostasis in pulmonary fibrosis
Source: PubMed Central journal article supplement (PMC11343593; doi:10.1172/jci.insight.175290), 2024-07-16
Supplement: jciinsight-9-175290-s231.pdf [file jciinsight-9-175290-s231.pdf]

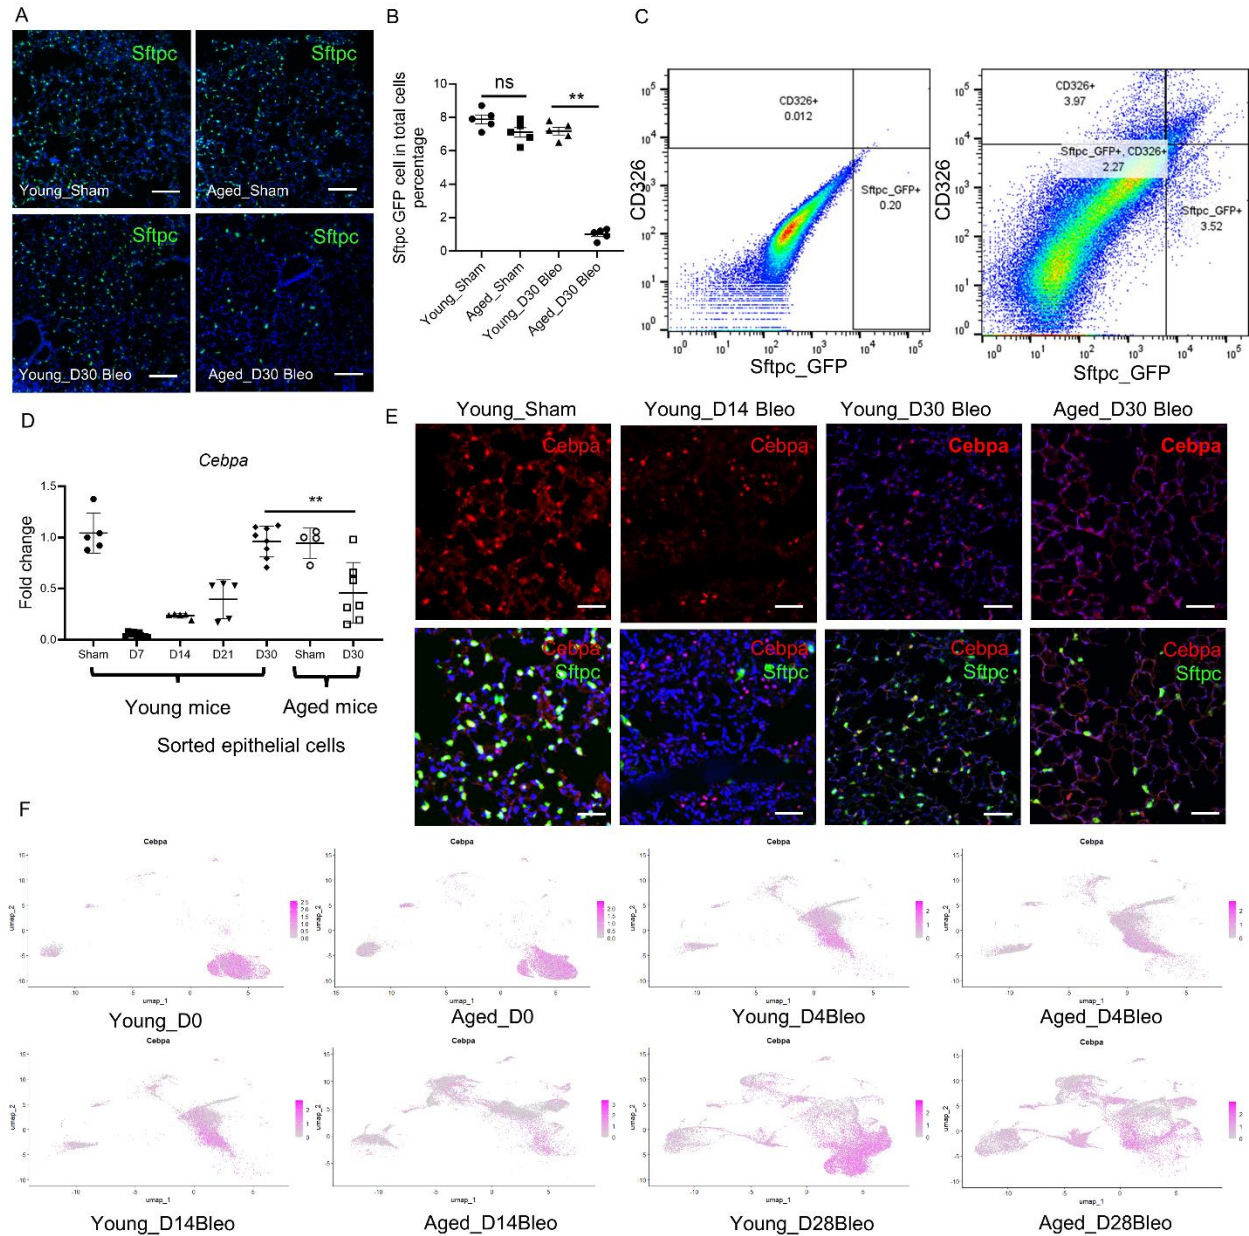

**Figure S1.** (A) Representative images of AT2 cells represented by Sftpc expression in young (2-month-old; n=5 per timepoint) and aged (18-month-old; n=5 per timepoint) mice 30 days post-bleomycin injury, as lung fibrosis was resolving. DAPI= blue, Sftpc=green. Scale bar=200  $\mu$ m. (B) AT2 cells were quantified as percentage of total cells in the lung from 30 days post-bleomycin injury between young and aged mice. (C) Representative flow cytometry analysis of CD326+ cells and Sftpc\_GFP cells in the mice lung. (D) Quantitative PCR of *Cebpa* gene expression performed on flow cytometry–sorted epithelial cells (CD326+, CD45-, CD31-) isolated from the lungs of young and aged mice. (E) Representative immunostaining images of

Cebpa expression in young (2-month-old; n=5 per timepoint) and aged (18-month-old; n=5 per timepoint) mice after bleomycin injury, as lung fibrosis was resolving. (F) UMAP plot of *Cebpa* expression at different time points (D0, D4, D14, D28) after bleomycin injury in the lung of young and aged mice from reanalysis of GSE157995. Data were analyzed using a Mann–Whitney U test. Statistical significance: \*P<0.05, \*\*P<0.01, ns = not significant.

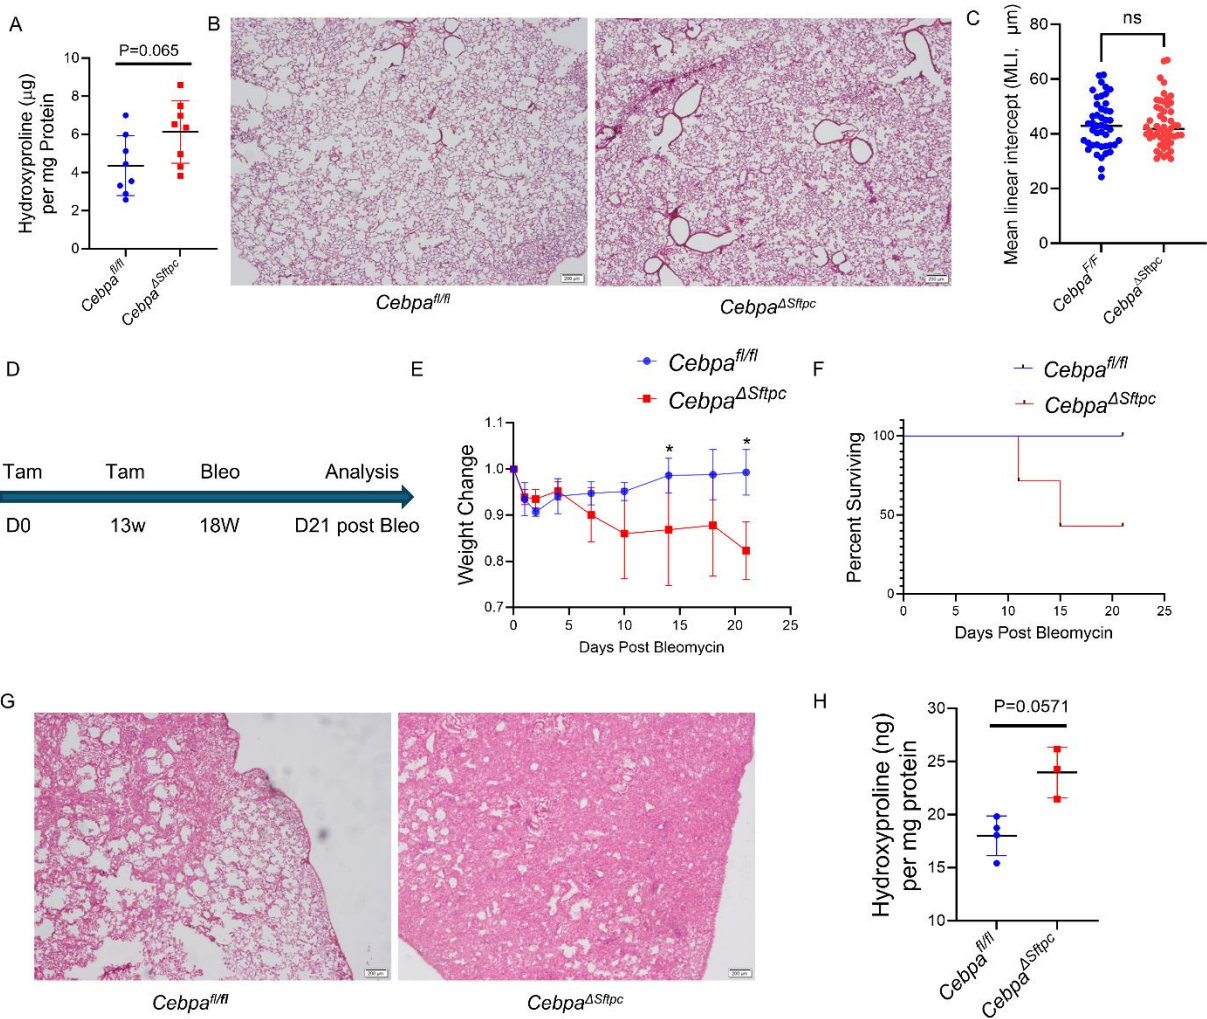

**Figure S2.** (A) Hydroxyproline assay showing collagen deposition in the lungs of *Cebpa*<sup>ΔSftpc</sup> (n=8) and *Cebpa*<sup>fl/fl</sup> (n=8) mice 4 weeks after tamoxifen treatment to delete the *Cebpa* gene in *Cebpa*<sup>ΔSftpc</sup> mice. (B) Representative hematoxylin and eosin (H&E) staining images showing lung sections from *Cebpa*<sup>ΔSftpc</sup> (n=4) and *Cebpa*<sup>fl/fl</sup> (n=4) mice 4 weeks after tamoxifen treatment. Scale bar=200 μm. (C) Mean linear intercept measurement of H&E staining images from *Cebpa*<sup>ΔSftpc</sup> (n=4) and *Cebpa*<sup>fl/fl</sup> (n=4) mice 4 weeks after tamoxifen treatment. (D) Schematic showing timeline for tamoxifen treatment (to delete *Cebpa* in *Cebpa*<sup>ΔSftpc</sup> mice), bleomycin treatment (to induce fibrosis), and analysis for *Cebpa*<sup>ΔSftpc</sup> (n=7) and *Cebpa*<sup>fl/fl</sup> mice (n=5). (E) Weight and (F) survival of *Cebpa*<sup>ΔSftpc</sup> and *Cebpa*<sup>fl/fl</sup> mice from (A) post-bleomycin treatment. (G) Representative hematoxylin and eosin (H&E) staining images showing lung sections from *Cebpa*<sup>ΔSftpc</sup> (n=3) and *Cebpa*<sup>fl/fl</sup> mice (n=3) 21 days post-bleomycin treatment. (H)

Hydroxyproline assay for *Cebpa*<sup>ΔStpc</sup> (n=3) and *Cebpa*<sup>fl/fl</sup> mice (n=4), 21 days post-bleomycin treatment. Data were analyzed using a Mann–Whitney U test. Statistical significance: \*P<0.05, ns = not significant.

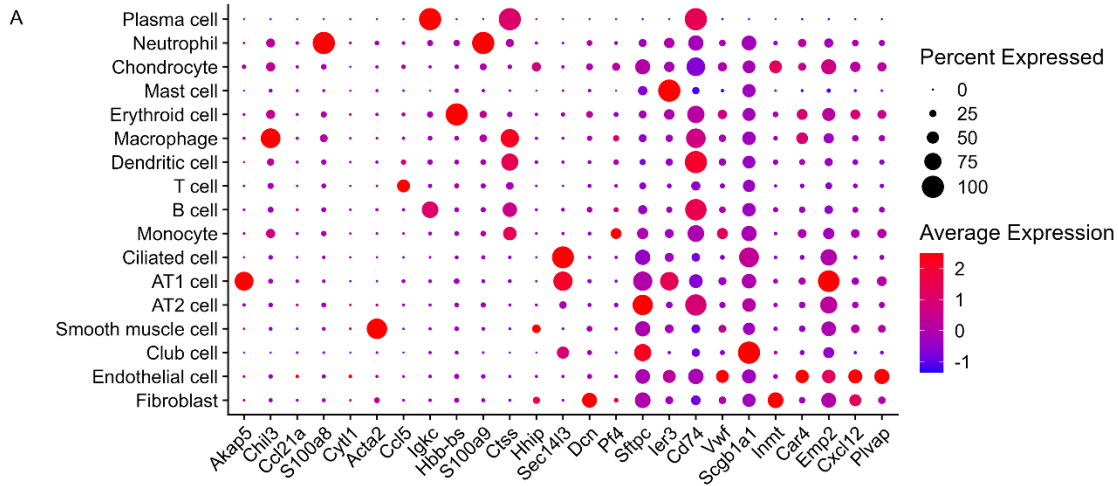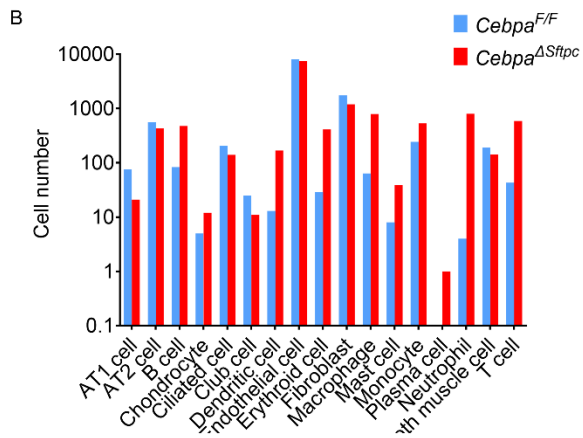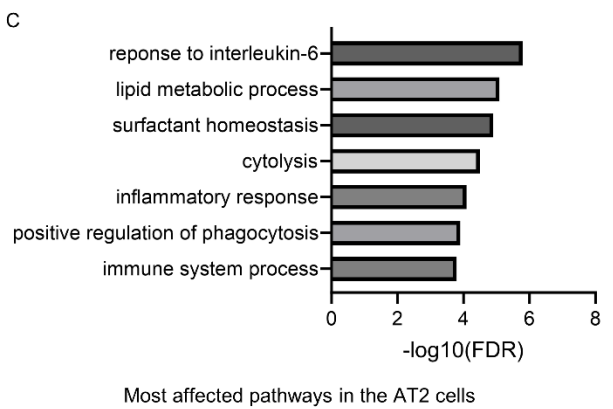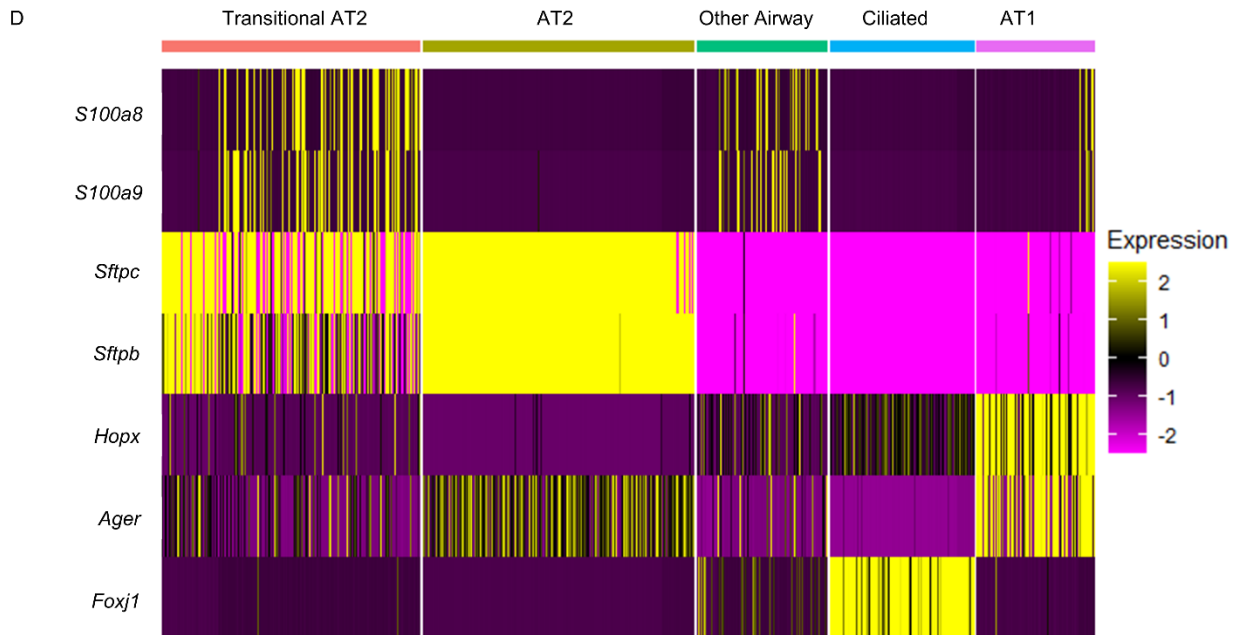

**Figure S3.** Dot plots showing the marker genes for each cluster and their cellular annotations for both *Cebpa*<sup>Δ*Sftpc*</sup> and *Cebpa*<sup>fl/fl</sup> mice in the scRNA-seq analysis. (B) Cell numbers for each cluster from the *Cebpa*<sup>Δ*Sftpc*</sup> and *Cebpa*<sup>fl/fl</sup> mouse samples shown in Fig 3A. (C) Pathway analysis of list of genes significantly downregulated in AT2 cells from *Cebpa*<sup>Δ*Sftpc*</sup> vs *Cebpa*<sup>fl/fl</sup> mice. (D) Heatmap showing the marker genes for each cluster from all the epithelial cells for for both *Cebpa*<sup>Δ*Sftpc*</sup> and *Cebpa*<sup>fl/fl</sup> mice.

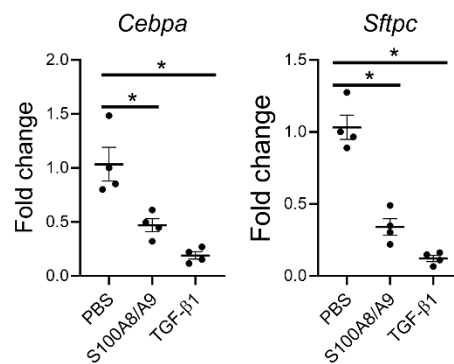

**Figure S4.** Quantitative PCR for *Cebpa* and *Sftpc* transcripts in *Sftpc*-gfp mouse lung organoids (n=4) treated with the recombinant proteins S100A8/A9 (100 ng/ml) and TGF-β1 (10 ng/ml). Cells were analyzed 72hours after treatment. Data were analyzed using a Mann–Whitney U test. \*P<0.05.



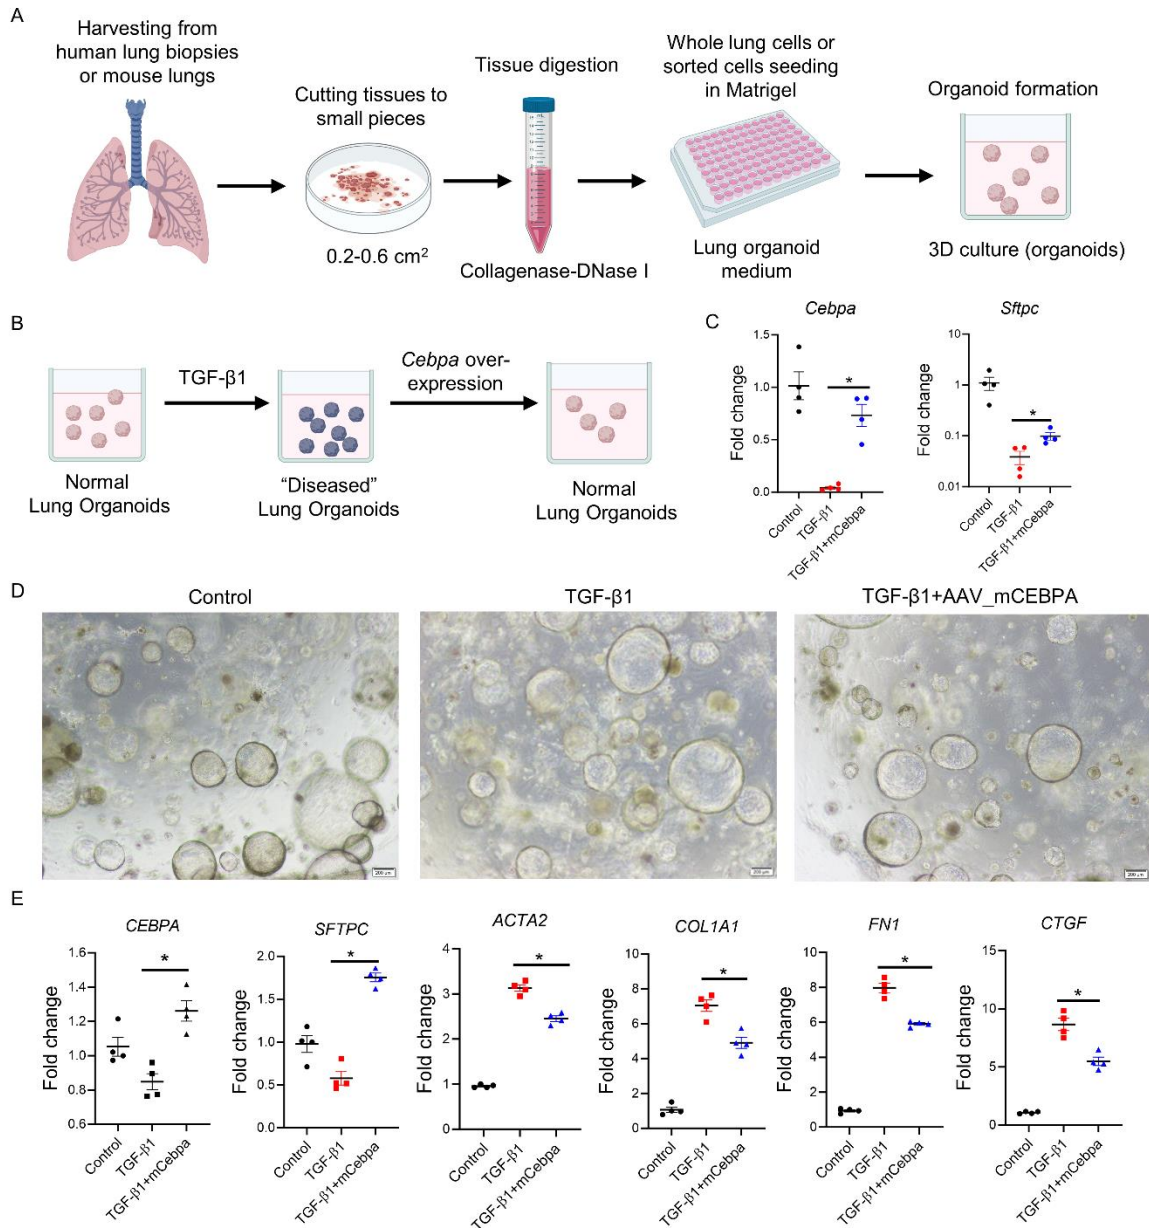

**Figure S5.** (A) Schematic showing how lung organoids are generated. Created with [BioRender.com](https://www.biorender.com). (B) Schematic showing how lung organoids are used for lung fibrosis model and test *Cebpa* overexpression on them. Created with [BioRender.com](https://www.biorender.com). (C) Quantitative PCR for *Cebpa* and *Sftpc* from mouse epithelial cells derived lung organoids treated with TGF- $\beta$ 1, with or without *Cebpa* overexpression. (D) Representative bright field image of organoids formed from human lung tissue (n=4). (E) Quantitative PCR for profibrotic gene and *Sftpc* transcripts from human lung organoids treated with TGF- $\beta$ 1, with or without AAV9-mCebpa treatment. Data were analyzed using a Mann–Whitney U test. \*P<0.05.

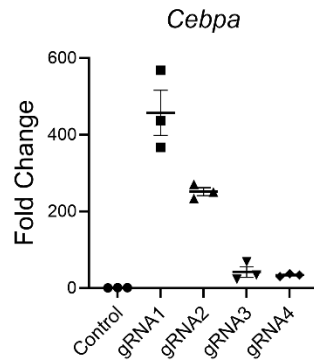

**Figure S6.** Quantitative PCR for *Cebpa* transcripts in Cas9+ CD326+ cells harvested from Cas9 mice and transfected with a dgRNA-MPH plasmid containing each of four individual gRNAs targeting the *Cebpa* promoter, as shown in Figure 6G. Cells were analyzed 48 hours after transfection.

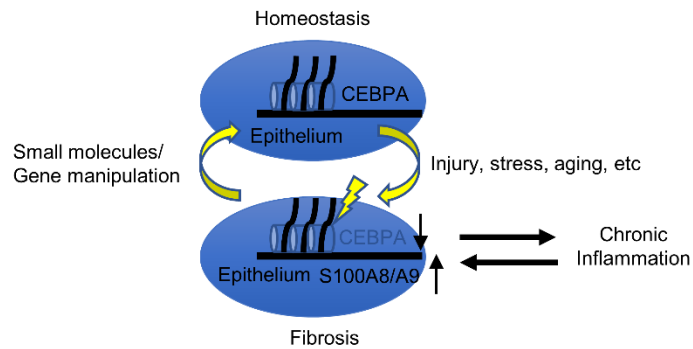

**Figure S7.** Schematic showing how CEBPA in AT2 cells (blue ovals) mediates cellular identity and tissue homeostasis.
