# Supplementary material for: Targeting CEBPA to restore cellular identity and tissue homeostasis in pulmonary fibrosis
Source: PubMed Central journal article supplement (PMC11343593; doi:10.1172/jci.insight.175290), 2024-07-16

Figure 2D

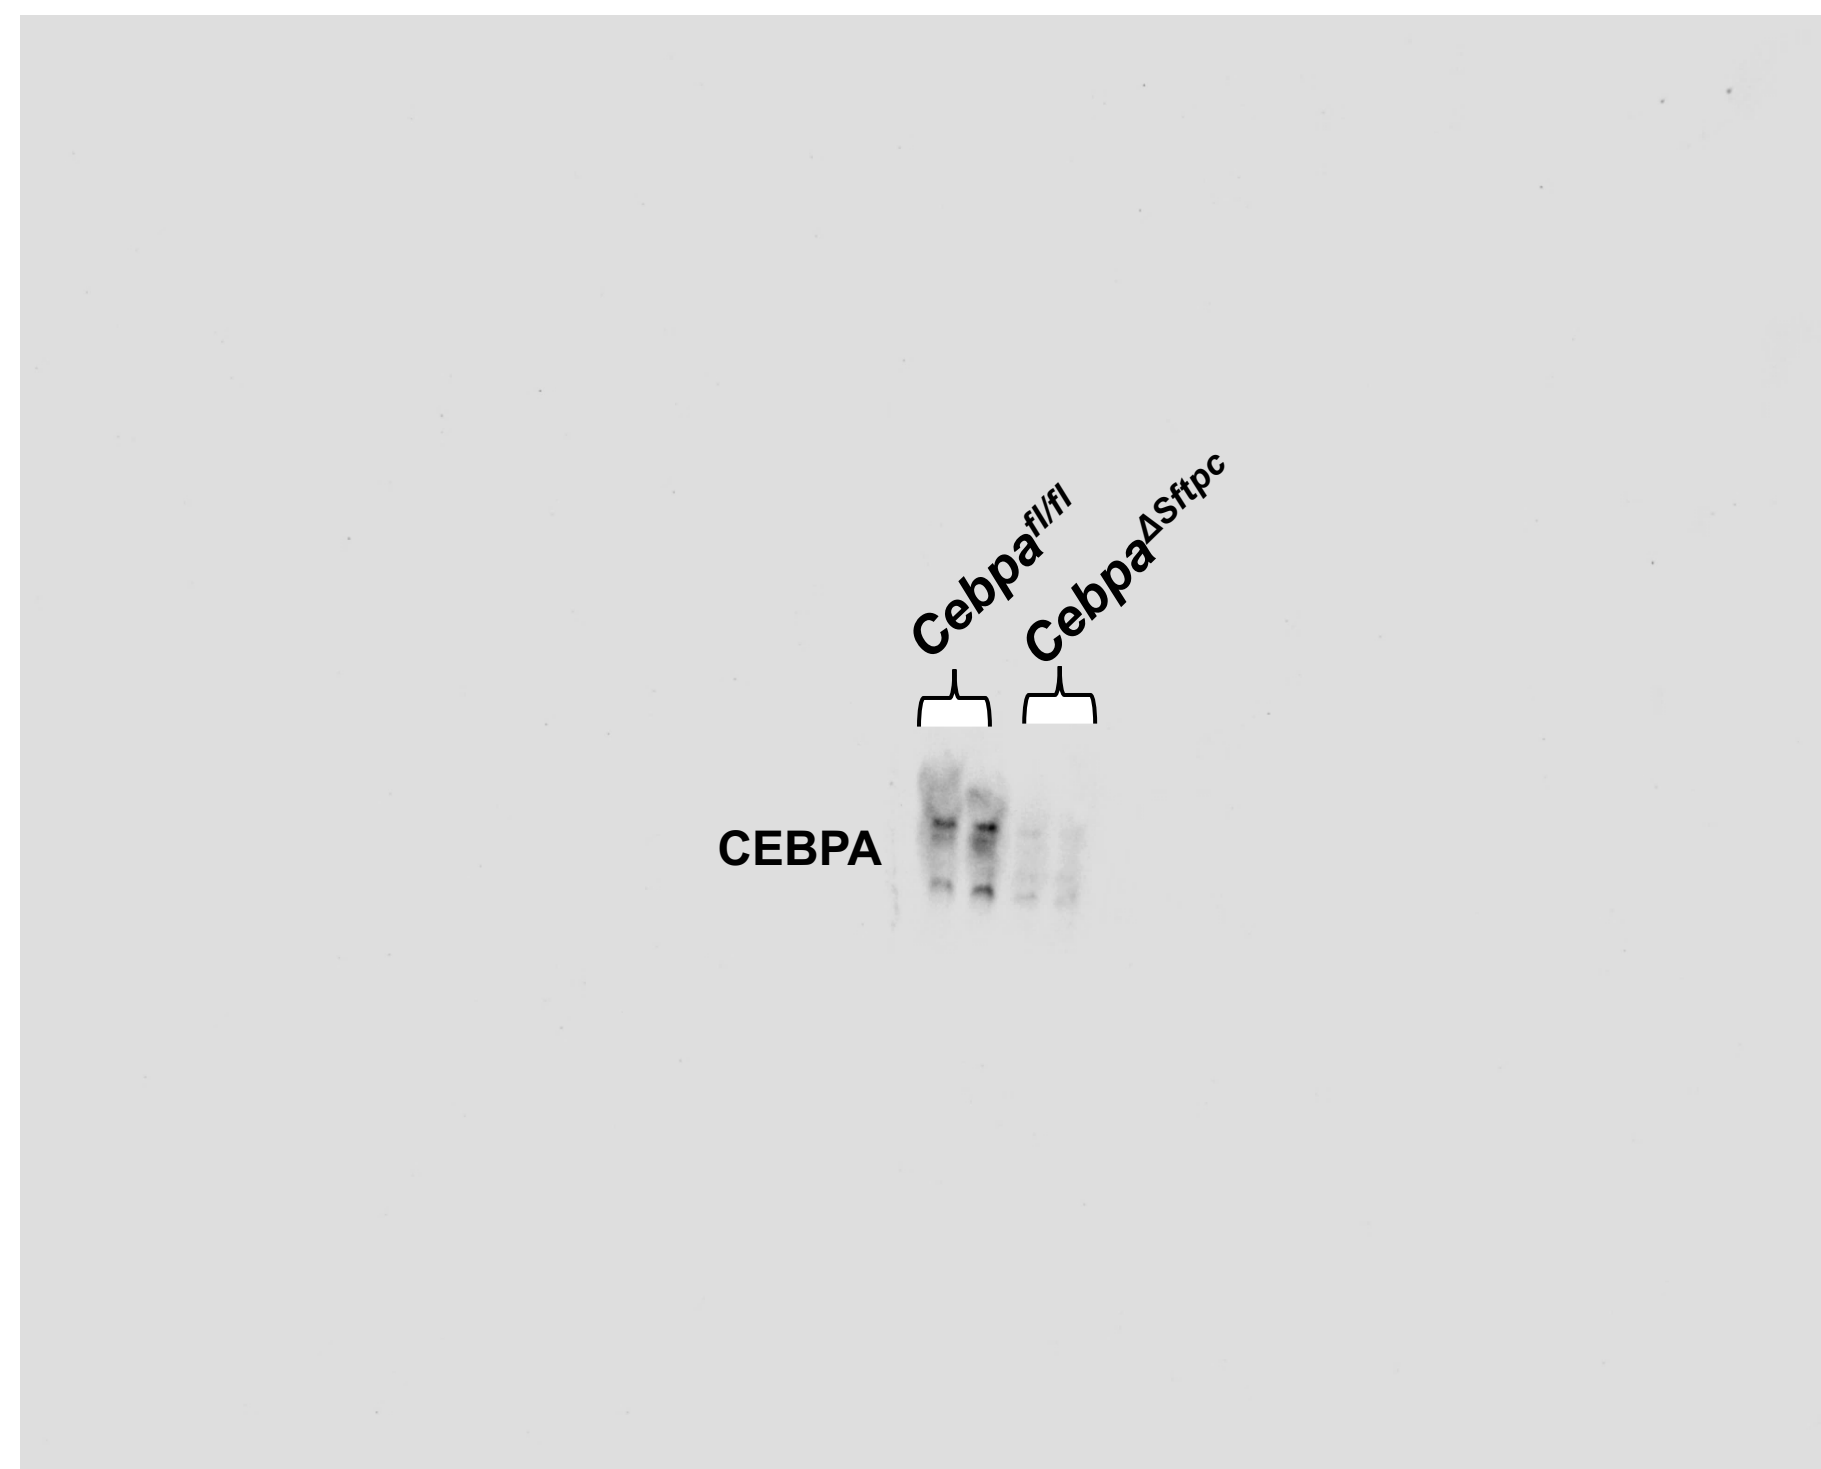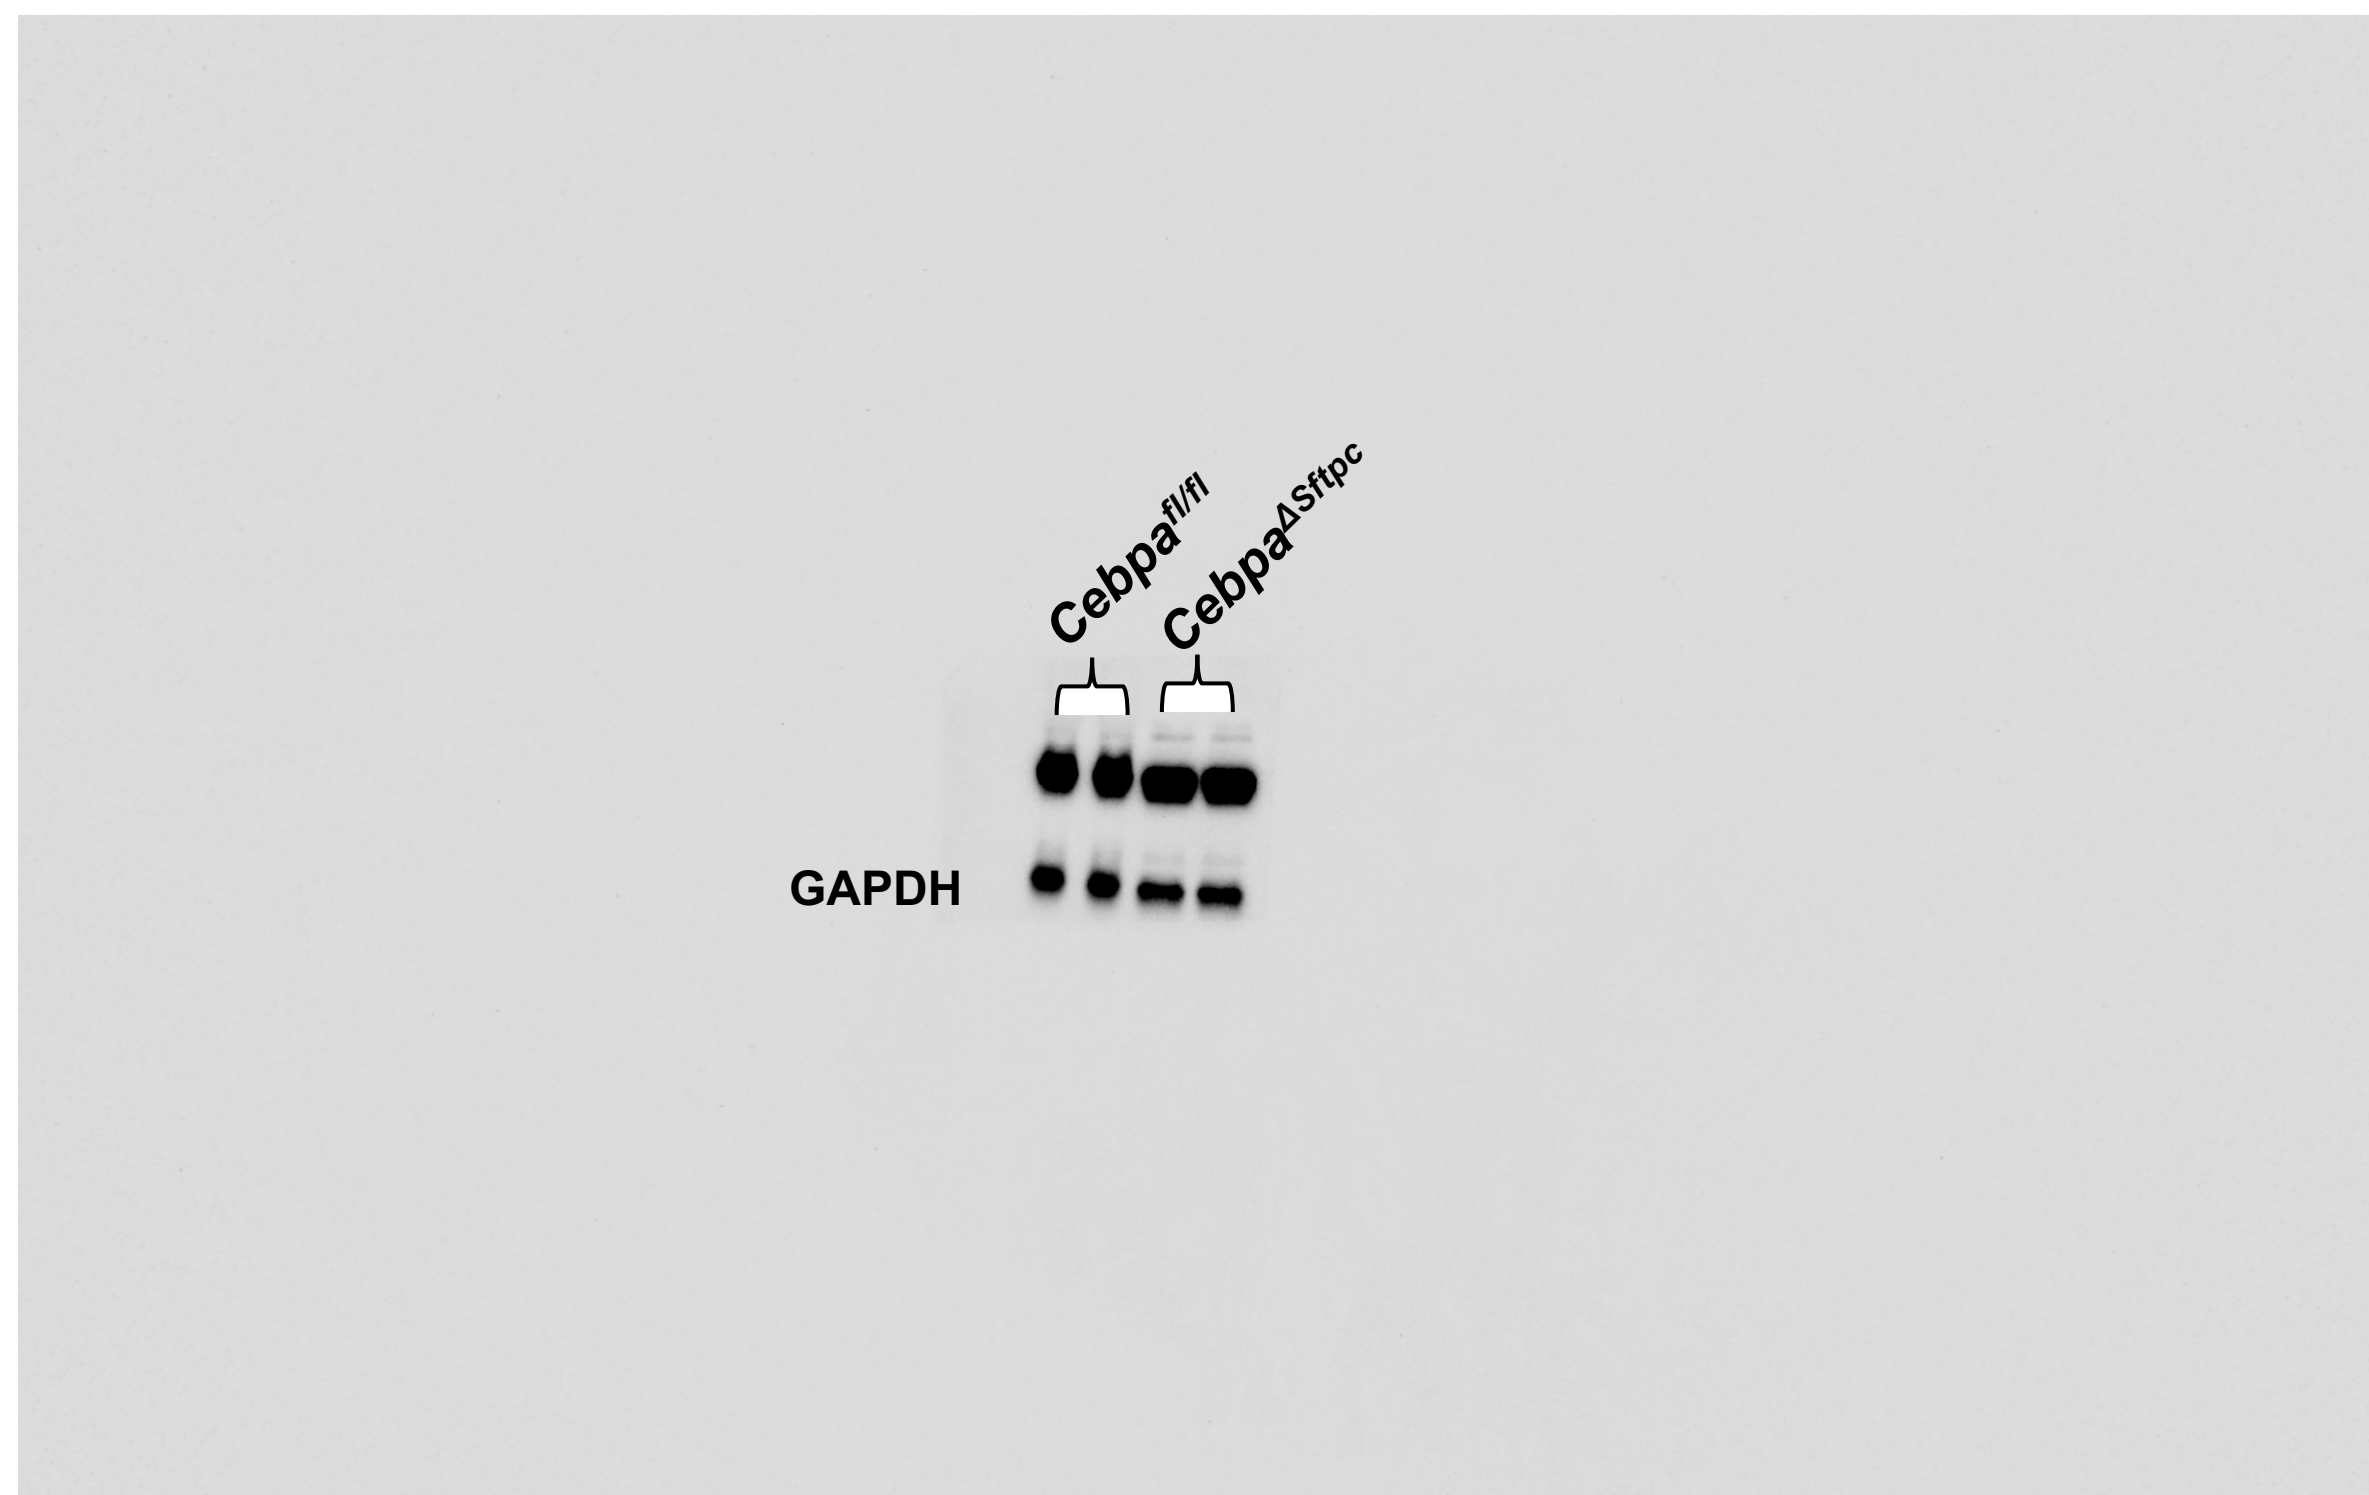

Figure 2H

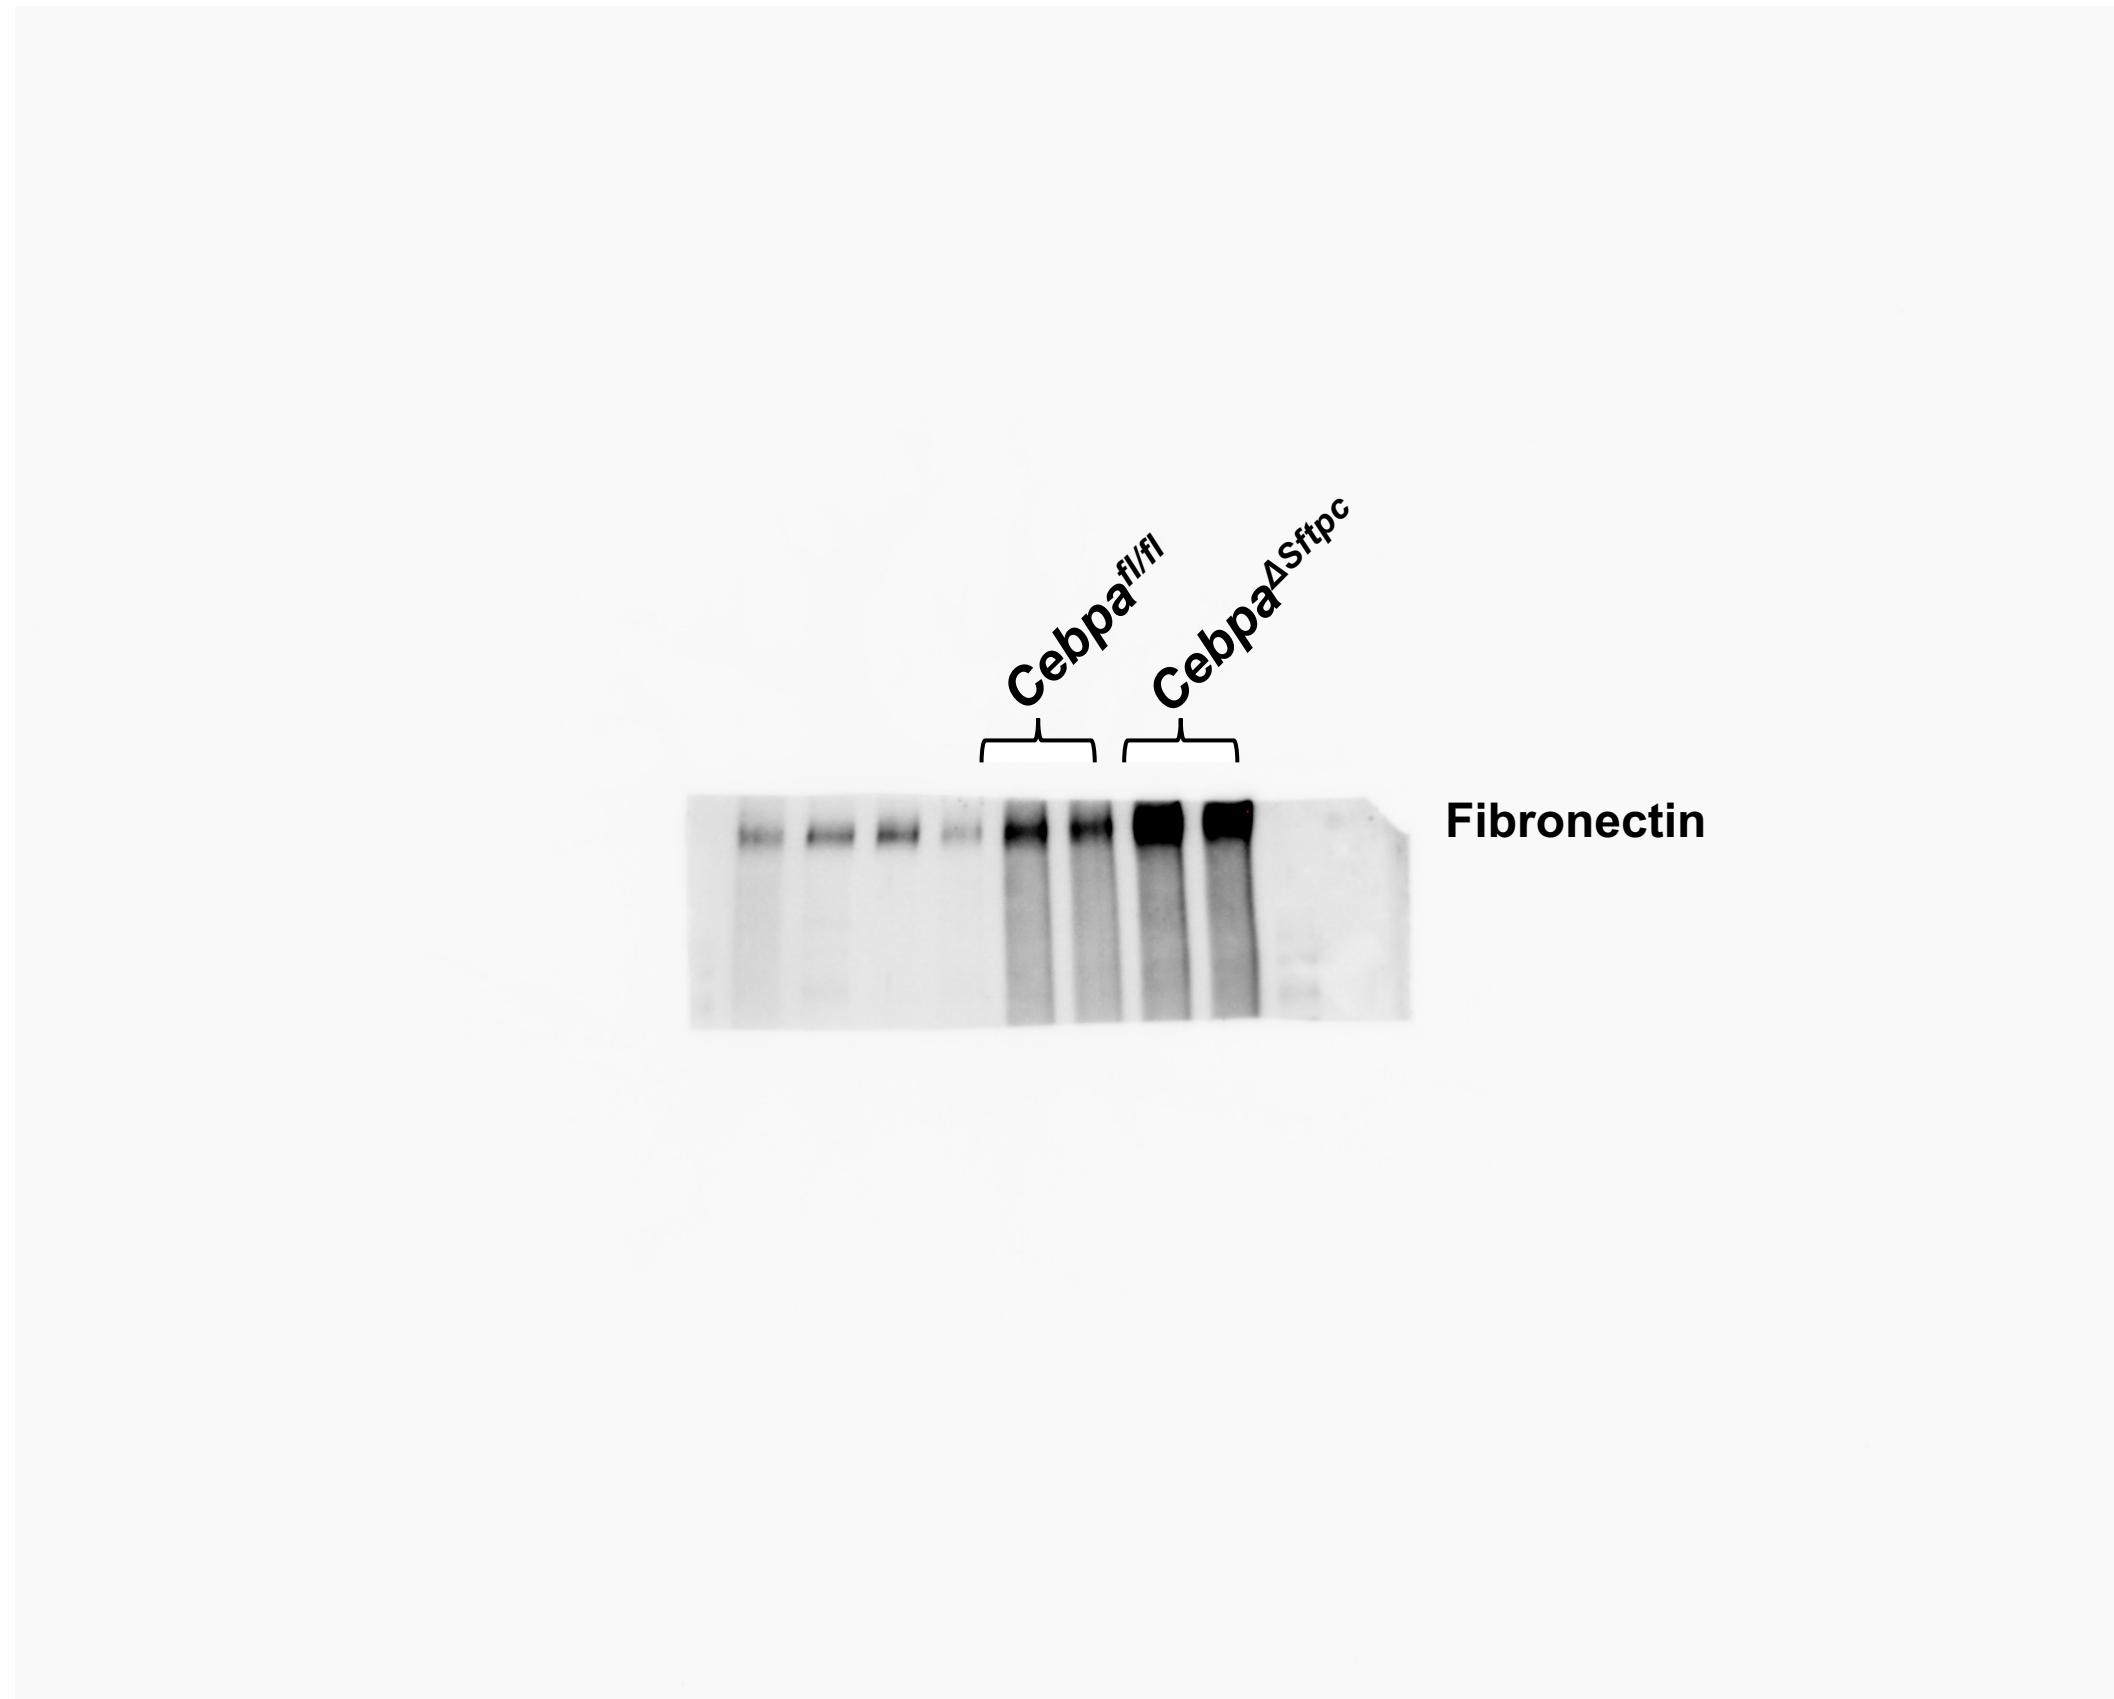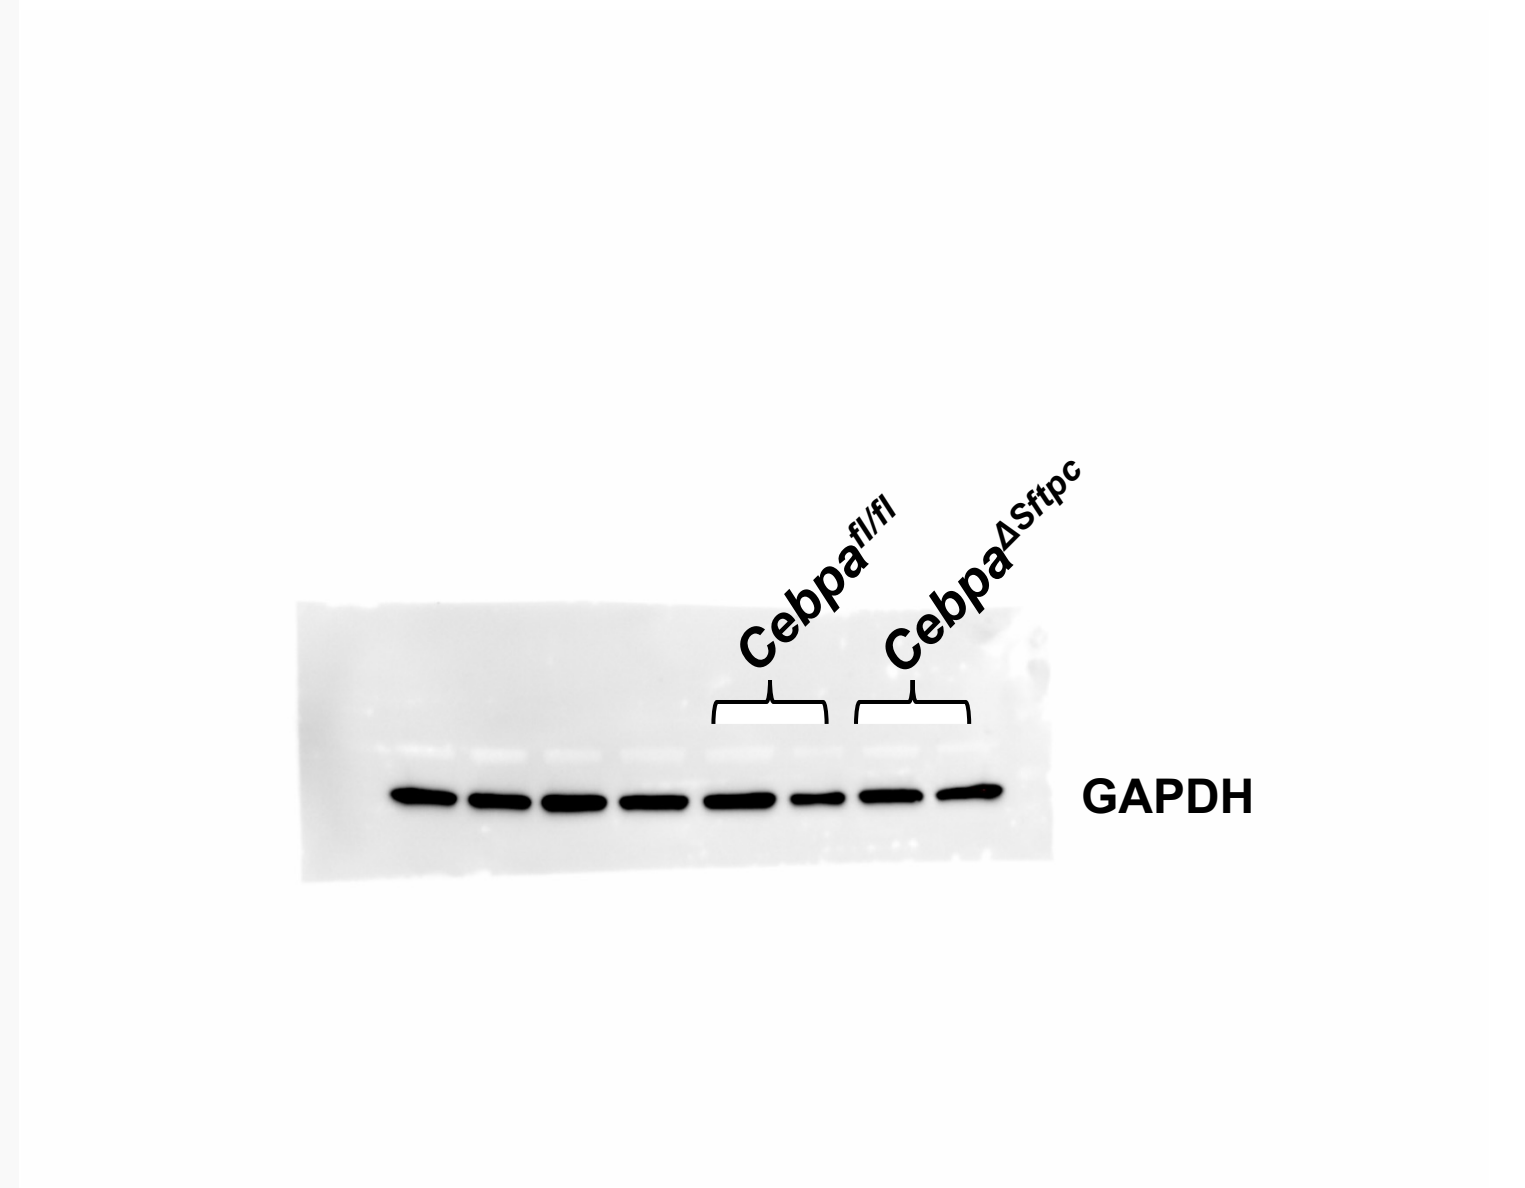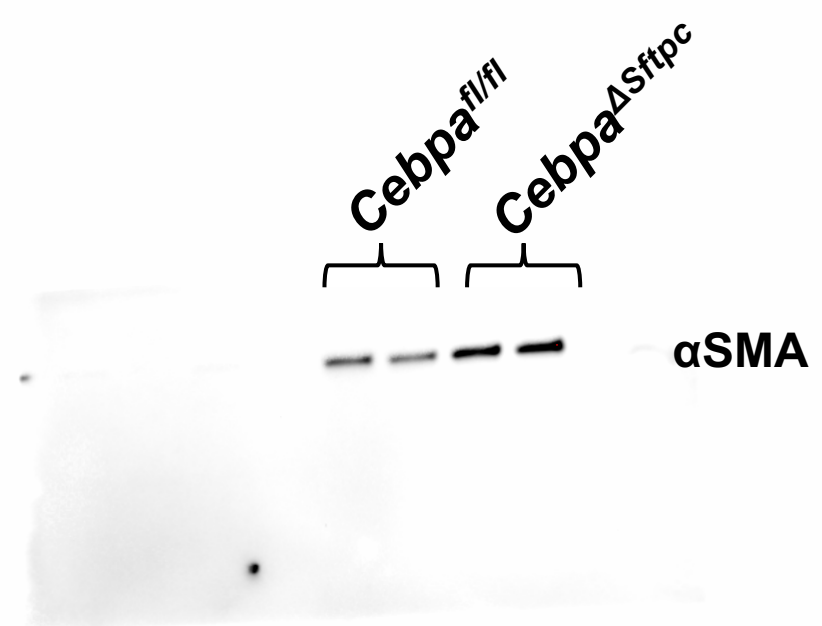

Figure 6I

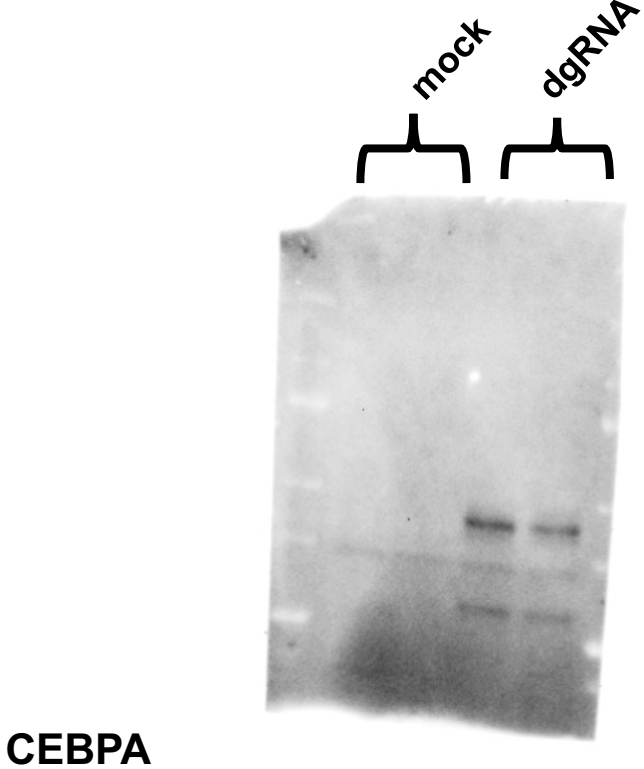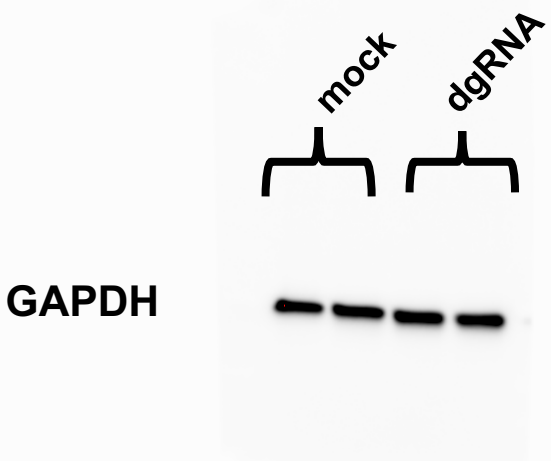

Supplement: jciinsight-9-175290-s232.pdf [file jciinsight-9-175290-s232.pdf]
